# Supplementary material
Source: Springer Nature journal article supplement (https://www.springermedizin.de/resource/supplementary/12885_2009_1941_MOESM2_ESM.pdf/9460144)

**a**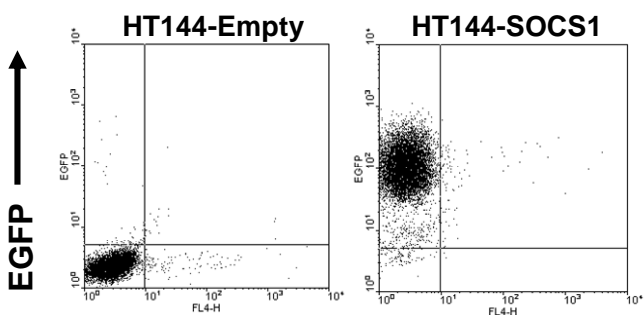**b**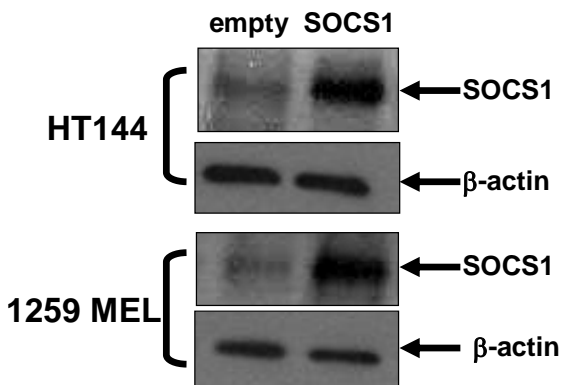**c**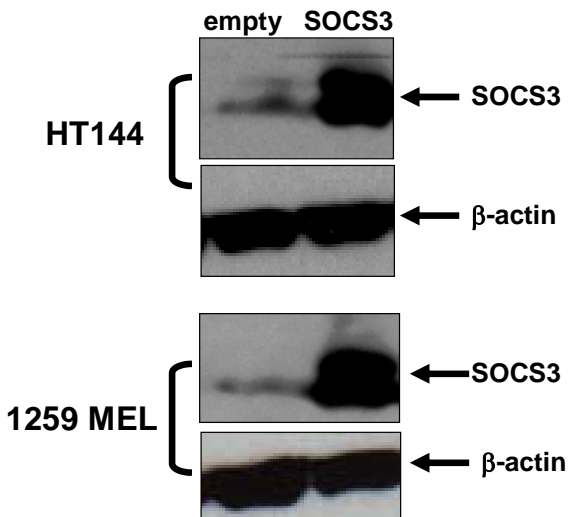

Supplement: MOESM2 [file 9460144]
